# Supplementary material for: Liver-Support Therapies in Critical Illness—A Comparative Analysis of Procedural Characteristics and Safety
Source: MDPI journal article supplement (doi:10.3390/jcm12144669), 2023-07-13
Supplement: s1 [file s1]

## Supplementary Materials

# Liver-Support Therapies in Critical Illness—A Comparative Analysis of Procedural Characteristics and Safety

## Supplemental Tables

**Table S1.** Relative and absolute changes of laboratory parameters in response to CytoSorb, MARS and TPE treatments (all treatments).

| CytoSorb                |    |        |               | MARS |        |               | TPE |        |               | p Value |
|-------------------------|----|--------|---------------|------|--------|---------------|-----|--------|---------------|---------|
| Relative changes [%]    | n  | Median | IQR           | n    | Median | IQR           | n   | Median | IQR           |         |
| Total bilirubin         | 51 | -32.0  | -38.1 – -19.6 | 63   | -7.5   | -4.7 – +23.0  | 77  | -17.9  | -26.2 – -4.3  | <0.001  |
| Lactate                 | 44 | -5.7   | -24.6 – +38.9 | 53   | -30.9  | +15.0 – +48.0 | 22  | -40.6  | -50.2 – -25.0 | <0.001  |
| LDH                     | 46 | -5.5   | -15.8 – +6.2  | 63   | -7.0   | -3.7 – +18.4  | 76  | -6.5   | -19.1 – +1.2  | 0.415   |
| P-Amylase               | 26 | -7.4   | -21.0 – +15.6 | 61   | -2.5   | -14.3 – +36.4 | 23  | -5.0   | -10.9 – +2.3  | 0.778   |
| Lipase                  | 26 | -6.5   | -22.9 – +3.2  | 61   | -9.1   | -9.1 – +31.0  | 24  | -1.6   | -15.9 – +8.3  | 0.540   |
| AST                     | 49 | -13.3  | -20.4 – +15.8 | 62   | -15.3  | -3.0 – +30.0  | 76  | -17.4  | -36.9 – +4.0  | 0.120   |
| ALT                     | 48 | -14.0  | -23.8 – +5.5  | 62   | -18.0  | -2.7 – +26.0  | 76  | -16.1  | -37.0 – -1.6  | 0.215   |
| AP                      | 48 | -3.1   | -9.6 – +11.8  | 62   | -9.3   | -5.7 – +19.0  | 76  | -13.1  | -29.0 – -2.6  | <0.001  |
| GGT                     | 50 | -5.0   | -10.5 – +10.4 | 62   | -6.9   | -6.3 – +22.0  | 76  | -12.7  | -34.6 – +3.2  | 0.002   |
| CRP                     | 44 | -4.6   | -26.7 – +18.7 | 55   | -12.4  | -22.8 – +26.2 | 67  | -16.7  | -34.0 – 0     | 0.117   |
| SCr                     | 46 | -11.0  | .27.3 – +0.3  | 62   | -22.4  | -36.0 – 0.0   | 77  | 0.0    | -8.1 – +3.7   | <0.001  |
| Urea                    | 46 | -19.1  | -34.2 – +7.0  | 62   | -9.6   | -20.1 – +7.9  | 77  | 0.0    | -9.6 – +12.9  | 0.001   |
| Absolute changes        | n  | Median | IQR           | n    | Median | IQR           | n   | Median | IQR           | p Value |
| Total bilirubin [mg/dl] | 51 | -6.9   | -9.5 – -4.2   | 63   | -0.7   | -3.2 – +0.5   | 77  | -1.6   | -0.3 – -3.9   | <0.001  |
| Lactate [mmol/l]        | 44 | +0.6   | -5.0 – +5.0   | 53   | -7.3   | -12.0 – +2.3  | 22  | -12.7  | -8.2 – -18.1  | <0.001  |
| LDH [U/l]               | 46 | -24.0  | -65.5 – +15.5 | 63   | -18.0  | -74.0 – +13.0 | 76  | -22.0  | -84.0 – +1.0  | 0.655   |
| P-Amylase [U/l]         | 26 | -1.0   | -7.5 – +1.0   | 61   | -1.0   | -29.0 – +6.0  | 23  | -1.0   | -5.5 – +0.5   | 0.934   |
| Lipase [mg/dl]          | 26 | -2.0   | -9.5 – +1.5   | 61   | -2.0   | -26.0 – +5.0  | 24  | -0.5   | -5.5 – +1.8   | 0.660   |
| AST [U/l]               | 49 | -9.0   | -21.8 – +14.8 | 62   | -19.0  | -107.0 – +3.0 | 76  | -13.0  | -92.0 – +3.0  | 0.117   |
| ALT [U/l]               | 48 | -10.0  | -29.0 – +4.0  | 62   | -14.0  | -44.0 – +3.5  | 76  | -10.0  | -58.0 – -1.0  | 0.5133  |
| AP [U/l]                | 48 | -7.0   | -40.0 – +35.0 | 62   | -21.0  | -56.0 – +6.8  | 76  | -18.0  | -43.0 – -3.0  | 0.047   |
| GGT [U/l]               | 50 | 1.0    | -14.5 – +11.5 | 62   | -9.5   | -54.0 – +4.0  | 76  | -9.0   | -27.0 – +1.0  | 0.031   |
| CRP [mg/l]              | 44 | -2.2   | -9.2 – +4.2   | 55   | -4.3   | -22.0 – +8.9  | 67  | -1.0   | -5.9 – 0      | 0.934   |
| SCr [mg/dl]             | 46 | -0.1   | -0.3 – 0.0    | 62   | -0.2   | -0.5 – 0.0    | 77  | 0.0    | -0.1 – 0.0    | <0.001  |
| Urea [mg/dl]            | 46 | -6.5   | -23.3 – +3.3  | 62   | -8.0   | -20.5 – +5.3  | 77  | 0.0    | -5.0 – +4.5   | 0.007   |

Molecular Adsorbent Recirculating System (MARS); Therapeutic Plasma Exchange (TPE); Lactate Dehydrogenase (LDH); Pancreas-Amylase (P-Amylase); Aspartate transaminase (AST); Alanine transaminase (ALT); Alkaline phosphatase (AP); Gamma-glutamyl Transpeptidase (GGT); C-reactive Protein (CRP); Interquartile range (IQR); Serum creatinine (SCr). *n* indicates available datasets for each parameter before and after treatment.

**Table S2.** Relative and absolute changes after first treatment of CytoSorb, MARS and TPE therapy.

| CytoSorb             |    |        |               | MARS |        |               | TPE |        |               | p Value |
|----------------------|----|--------|---------------|------|--------|---------------|-----|--------|---------------|---------|
| Relative changes [%] | n  | Median | IQR           | n    | Median | IQR           | n   | Median | IQR           |         |
| Total bilirubin      | 19 | -33.2  | -39.5 – -19.4 | 14   | -8.9   | -26.3 – +5.7  | 17  | -24.6  | -34.2 – -5.0  | 0.140   |
| Lactate              | 19 | -14.8  | -42.8 – +36.0 | 10   | -42.5  | -64.0 – -0.35 | 9   | -39.8  | -45.6 – -23.3 | 0.280   |
| LDH                  | 19 | -8.6   | -17.3 – +6.4  | 14   | -5.2   | -11.4 – +34.8 | 17  | -26.6  | -40.0 – -8.6  | 0.002   |
| P-Amylase            | 13 | -7.7   | -21.0 – +15.6 | 13   | +0.0   | -30.0 – +24.6 | 9   | -9.5   | -26.8 – -2.5  | 0.406   |
| Lipase               | 13 | -16.2  | -27.8 – -0.9  | 13   | +0.0   | -7.9 – +12.7  | 10  | -17.1  | -28.6 – -7.7  | 0.033   |
| AST                  | 19 | -16.9  | -24.2 – +17.5 | 14   | -14.2  | -33.0 – +51.3 | 17  | -44.8  | -60.9 – -29.4 | <0.001  |
| ALT                  | 18 | -14.5  | -26.1 – +9.7  | 14   | -16.9  | -27.0 – +9.6  | 17  | -50.9  | -59.4 – -37.1 | <0.001  |
| AP                   | 16 | +3.7   | -9.0 – +15.0  | 14   | -7.5   | -21.1 – +15.2 | 17  | -37.1  | -49.3 – -24.3 | <0.001  |

|                         |          |               |                |          |               |                |          |               |                |                |
|-------------------------|----------|---------------|----------------|----------|---------------|----------------|----------|---------------|----------------|----------------|
| GGT                     | 19       | -2.2          | -11.8 – +11.1  | 13       | -11.8         | -27.5 – +9.6   | 17       | -42.3         | -58.0 – -31.8  | <0.001         |
| CRP                     | 19       | -5.6          | -29.9 – +7.9   | 11       | +3.0          | -26.9 – +50.8  | 12       | -34.4         | -52.0 – -3.8   | 0.037          |
| SCr                     | 20       | -9.2          | -26.7 – +0.8   | 13       | -29.2         | -34.9 – -20.5  | 17       | -12.2         | -20.0 – +5.2   | 0.011          |
| Urea                    | 20       | -19.8         | -31.9 – +6.7   | 13       | -3.7          | -27.8 – +8.7   | 17       | -3.8          | -15.9 – +10.2  | 0.558          |
| <b>Absolute changes</b> | <b>n</b> | <b>Median</b> | <b>IQR</b>     | <b>n</b> | <b>Median</b> | <b>IQR</b>     | <b>n</b> | <b>Median</b> | <b>IQR</b>     | <b>p Value</b> |
| Total bilirubin [mg/dl] | 19       | -6.0          | -8.8 – -3.4    | 14       | -0.9          | -4.7 – +0.3    | 17       | -3.7          | -7.2 – -0.4    | 0.017          |
| Lactate [mmol/l]        | 19       | -2.8          | -11.5 – +5.7   | 10       | -8.1          | -30.3 – +0.5   | 9        | -12.7         | -15.1 – -6.4   | 0.176          |
| LDH [U/l]               | 19       | -29.0         | -116.0 – +18.0 | 14       | -13.0         | -62.5 – +140.5 | 17       | -88.0         | -191.0 – -54.5 | 0.011          |
| P-Amylase [U/l]         | 13       | -1.0          | -10.0 – +1.0   | 13       | +0.0          | -12.5 – +37.0  | 9        | -5.0          | -20.5 – -0.5   | 0.244          |
| Lipase [mg/dl]          | 13       | -3.0          | -15.0 – +30.0  | 13       | +0.0          | -4.0 – +30.0   | 10       | -6.0          | -15.0 – -1.0   | 0.086          |
| AST [U/l]               | 19       | -13.0         | -42.0 – +19.0  | 14       | -20.0         | -144.8 – +56.0 | 17       | -104.0        | -640.0 – -36.0 | 0.004          |
| ALT [U/l]               | 18       | -13.0         | -52.3 – +6.5   | 14       | -12.0         | -133.8 – +6.8  | 17       | -120.0        | -604.5 – -22.0 | 0.010          |
| AP [U/l]                | 16       | +0.5          | -23.5 – +24.8  | 14       | -21.5         | -57.3 – +12.0  | 17       | -83.0         | -161.0 – -32.0 | 0.001          |
| GGT [U/l]               | 19       | -2.0          | -13.0 – +9.0   | 13       | -32.5         | -104.8 – +1.8  | 17       | -43.0         | -167.0 – -15.5 | 0.001          |
| CRP [mg/l]              | 19       | -2.4          | -27.8 – +7.5   | 11       | +6.1          | -22.0 – +24.5  | 12       | -4.4          | -26.5 – +1.4   | 0.178          |
| SCr [mg/dl]             | 20       | -0.1          | -0.3 – 0.0     | 13       | -0.5          | -0.8 – -0.3    | 17       | -0.2          | -0.3 – 0.0     | 0.011          |
| Urea [mg/dl]            | 20       | -6.0          | -23.8 – +7.8   | 13       | -3.0          | -23.0 – +6.0   | 17       | -2.0          | -17.0 – +2.5   | 0.908          |

Molecular Adsorbent Recirculating System (MARS); Therapeutic Plasma Exchange (TPE); Lactate Dehydrogenase (LDH); Pancreas-Amylase (P-Amylase); Aspartate transaminase (AST); Alanine transaminase (ALT); Alkaline phosphatase (AP); Gamma-glutamyl Transpeptidase (GGT); C-reactive Protein (CRP); Interquartile range (IQR); Serum Creatinine (SCr). *n* indicated available datasets for each parameters before and after treatment.

**Table S3.** Correlation analysis of absolute reduction of parameters studied and duration of treatment.

| Parameter       | r     | CytoSorb      |         |                | r     | MARS          |         |                | r     | TPE           |         |                |
|-----------------|-------|---------------|---------|----------------|-------|---------------|---------|----------------|-------|---------------|---------|----------------|
|                 |       | 95% CI        | p Value | R <sup>2</sup> |       | 95% CI        | p Value | R <sup>2</sup> |       | 95% CI        | p Value | R <sup>2</sup> |
| Total bilirubin | 0.00  | -0.32 – +0.24 | 0.732   | 0.03           | 0.33  | +0.05 – +0.52 | 0.011   | 0.11           | 0.21  | -0.02 – +0.42 | 0.064   | 0.01           |
| Lactate         | 0.05  | -0.36 – +0.20 | 0.070   | 0.26           | -0.18 | -0.44 – +0.11 | 0.561   | 0.01           | -0.37 | -0.68 – +0.07 | 0.084   | 0.00           |
| LDH             | 0.02  | -0.38 – +0.26 | 0.215   | 0.18           | 0.12  | -0.13 – +0.38 | 0.352   | 0.01           | 0.06  | -0.17 – +0.29 | 0.597   | 0.00           |
| P-Amylase       | 0.05  | -0.58 – +0.34 | 0.100   | 0.25           | -0.01 | -0.26 – +0.27 | 0.949   | 0.00           | 0.14  | -0.30 – +0.53 | 0.536   | 0.00           |
| Lipase          | 0.00  | -0.64 – +0.24 | 0.803   | 0.10           | 0.08  | -0.18 – +0.35 | 0.542   | 0.02           | 0.11  | -0.32 – +0.50 | 0.620   | 0.00           |
| AST             | 0.03  | -0.37 – +0.25 | 0.161   | 0.17           | 0.20  | -0.04 – +0.46 | 0.133   | 0.01           | 0.32  | +0.09 – +0.51 | 0.005   | 0.11           |
| ALT             | 0.02  | -0.33 – +0.30 | 0.262   | 0.14           | 0.09  | -0.02 – 0.48  | 0.480   | 0.00           | 0.27  | +0.05 – +0.48 | 0.017   | 0.05           |
| AP              | 0.01  | -0.21 – +0.41 | 0.397   | 0.03           | -0.09 | -0.28 – +0.25 | 0.493   | 0.02           | 0.00  | -0.23 – +0.24 | 0.974   | 0.01           |
| GGT             | 0.02  | -0.36 – +0.26 | 0.238   | 0.11           | -0.18 | -0.42 – +0.09 | 0.171   | 0.04           | 0.02  | -0.21 – +0.26 | 0.842   | 0.00           |
| CRP             | 0.00  | -0.34 – +0.27 | 0.970   | 0.02           | 0.07  | -0.23 – +0.32 | 0.595   | 0.00           | 0.29  | +0.04 – +0.50 | 0.019   | 0.00           |
| SCr             | -0.25 | -0.52 – +0.04 | 0.085   | 0.05           | -0.03 | 0.31 – +0.21  | 0.674   | 0.00           | -0.20 | -0.41 – +0.03 | 0.076   | 0.03           |
| Urea            | -0.19 | -0.46 – +0.11 | 0.208   | 0.07           | -0.02 | -0.28 – +0.23 | 0.852   | 0.01           | -0.01 | -0.24 – 0.22  | 0.939   | 0.00           |

Molecular Adsorbent Recirculating System (MARS); Therapeutic Plasma Exchange (TPE); Lactate Dehydrogenase (LDH); Pancreas-Amylase (P-Amylase); Aspartate transaminase (AST); Alanine transaminase (ALT); Alkaline phosphatase (AP); Gamma-glutamyl Transpeptidase (GGT); C-reactive Protein (CRP); Serum creatinine (SCr).

## Supplemental Figure

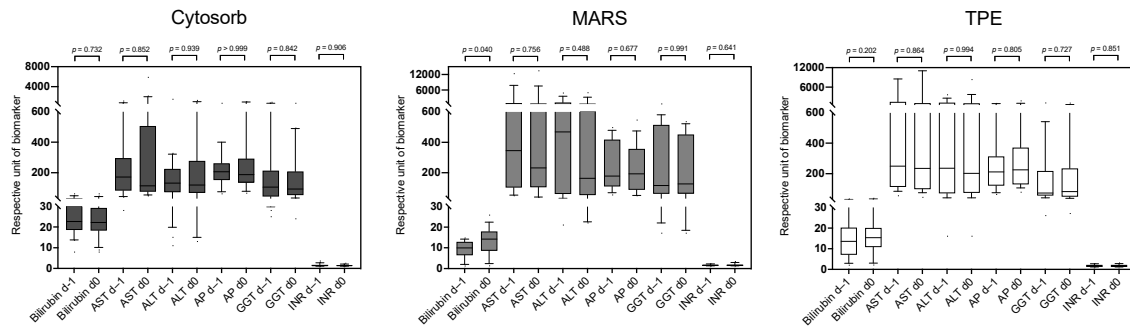

**Figure S1.** Course of routine liver parameters within two days before first liver support therapy.

Procedure-dependent absolute changes of blood pressure and vasopressor demand in response to Cytosorb, Molecular Adsorbent Recirculating System (MARS) and Therapeutic Plasma Exchange (TPE) therapy. Data are reported as box-and-whisker plots (interquartile range, 10% to 90% interval). D0 day of first liver support therapy, d-1 one day before first liver support therapy. Total bilirubin (Bilirubin) [mg/dL]; Aspartate transaminase (AST) [U/L]; Alanine transaminase (ALT) [U/L]; Alkaline phosphatase (AP) [U/L]; Gamma-glutamyl Transpeptidase (GGT) [U/L]; International Normalized Ratio (INR).
